# Supplementary material for: Synergic Effect of Early Administration of Probiotics and Adipose-Derived Mesenchymal Stem Cells on Alleviating Inflammation-Induced Chronic Neuropathic Pain in Rodents
Source: MDPI journal article supplement (doi:10.3390/ijms231911974), 2022-10-09
Supplement: s1 [file s1]

Figure S1. Relative abundances of microbiome analysis based on Taxonomic profile

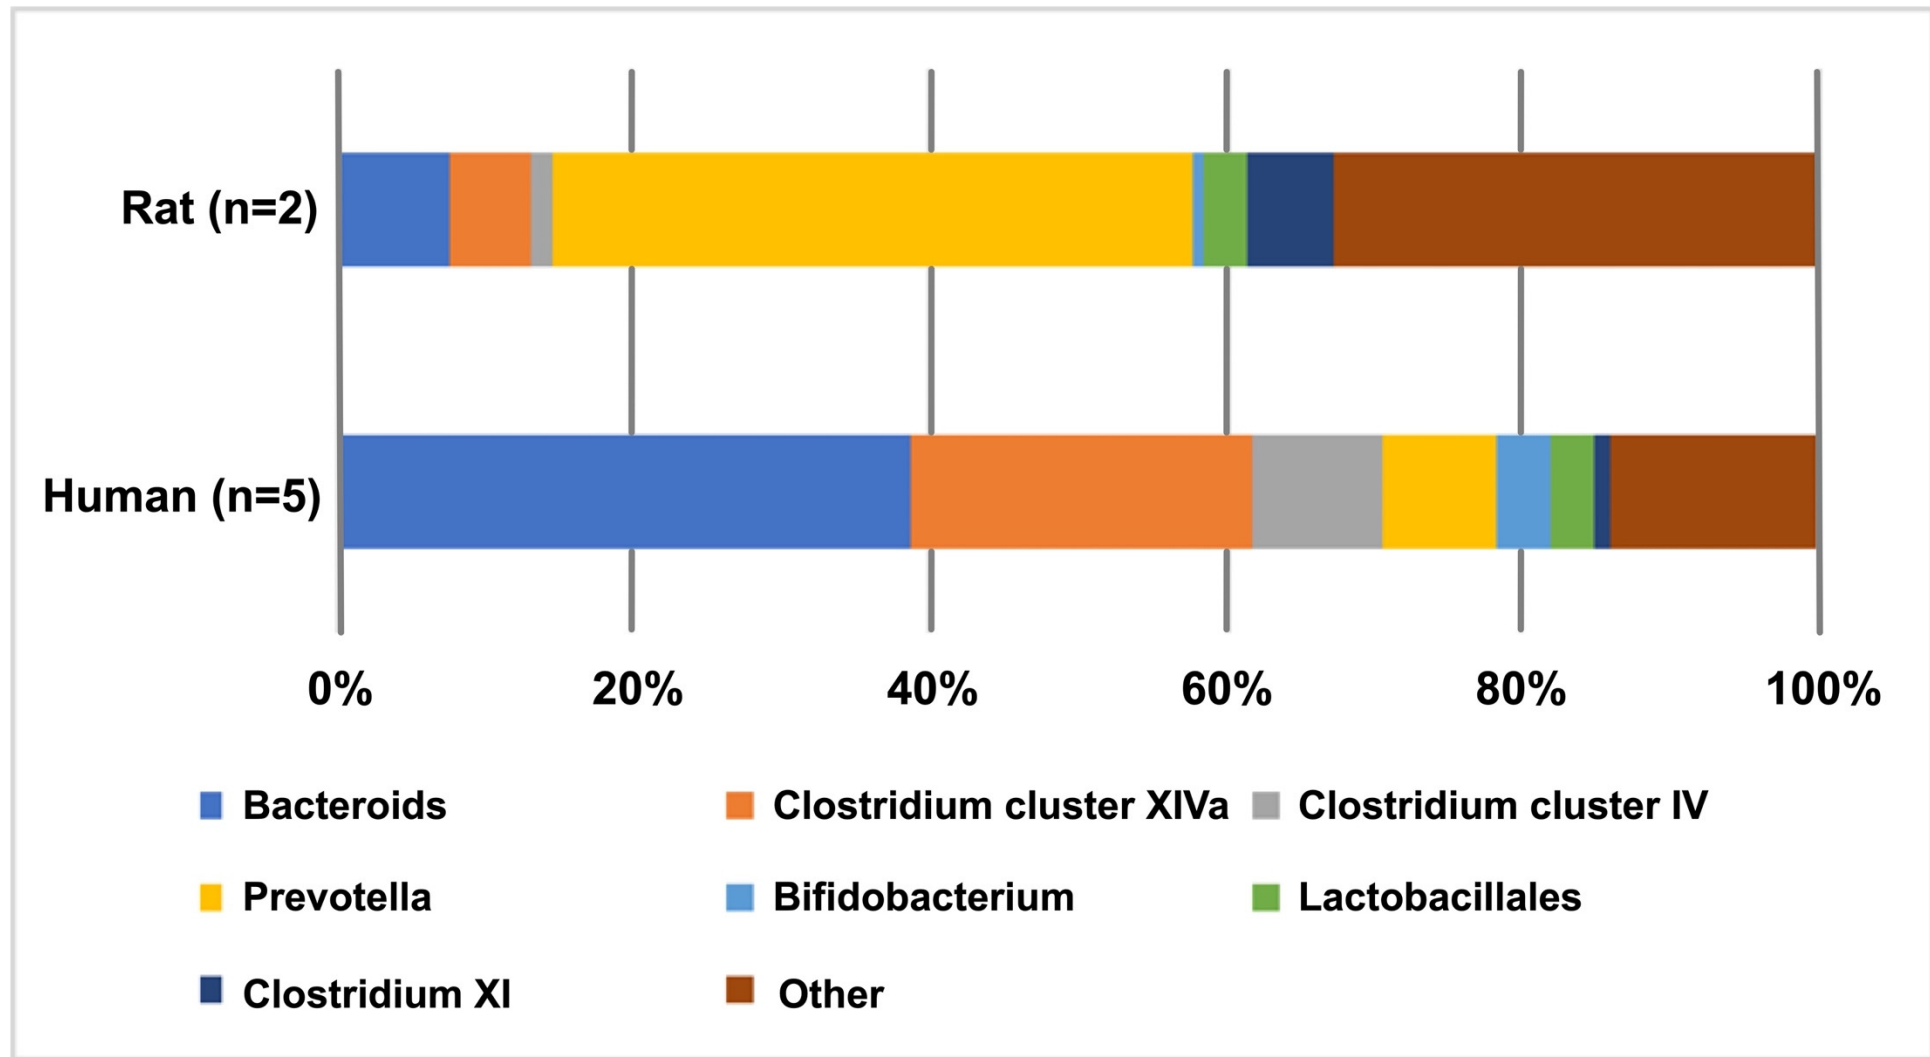

Figure S2. Procedure and protocol of experimental strategy

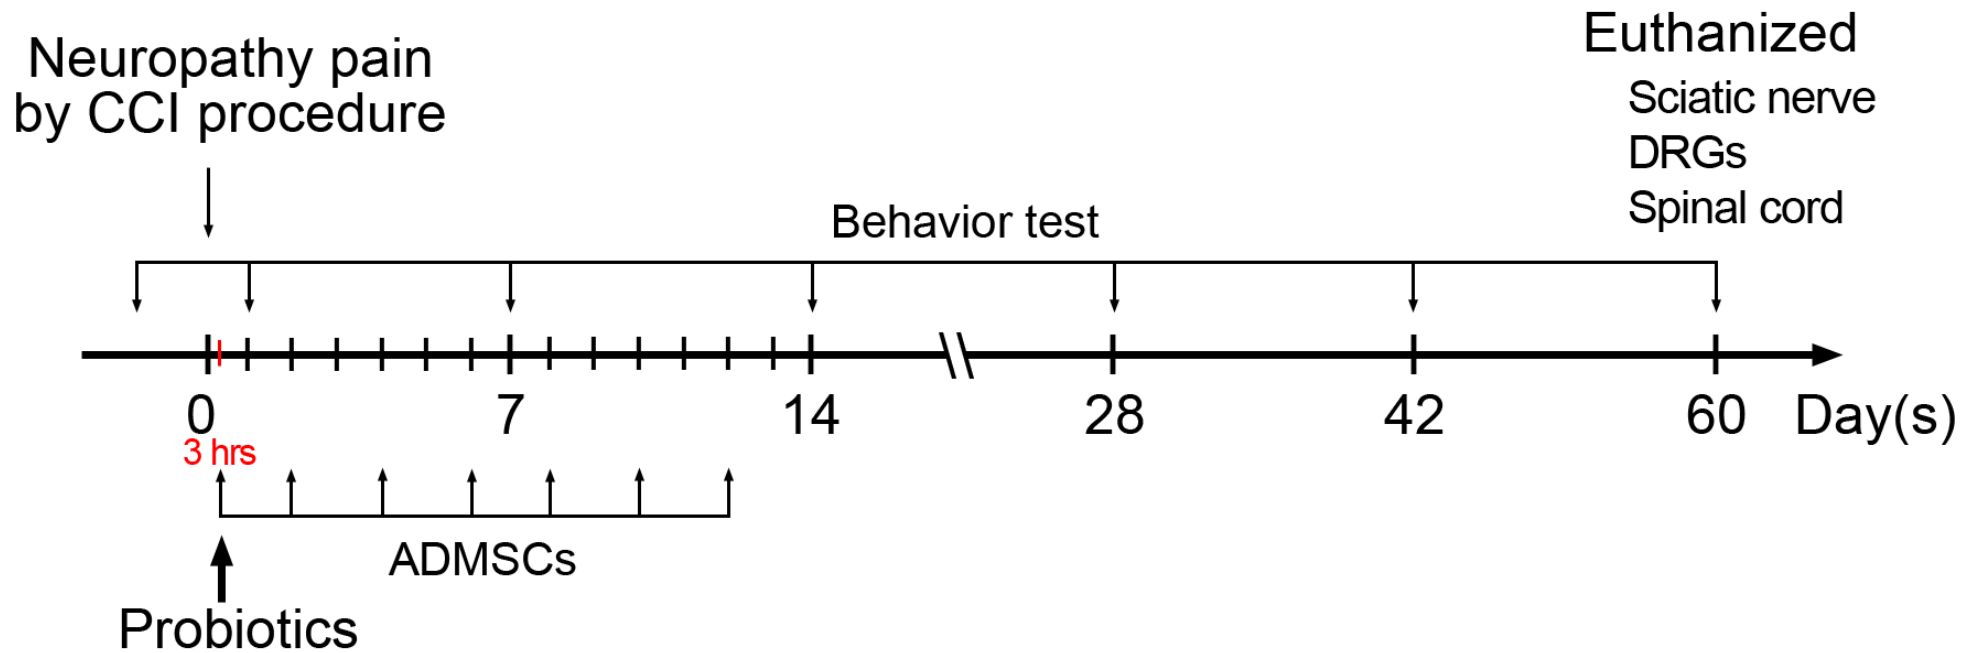

**Table S1. Each percentage of microbiome analysis in healthy people and rats**

|                              | Heathy people (n=5) | Heathy rat (n=2) |
|------------------------------|---------------------|------------------|
| Bacteroides (%)              | 38.75               | 7.48             |
| Clostridium cluster XIVa (%) | 23.16               | 5.44             |
| Clostridium cluster IV (%)   | 8.77                | 1.63             |
| Prevotella (%)               | 7.62                | 43.25            |
| Bifidobacterium (%)          | 3.48                | 0.78             |
| Lactobacillales (%)          | 3.14                | 2.79             |
| Clostridium XI (%)           | 1.23                | 5.76             |
| Others (%)                   | 13.85               | 32.87            |
| Total (%)                    | 100                 | 100              |

**Table S2. Antibodies used for immunofluorescence (IF) and Western blot analyses**

| <b>Product name</b>                                                     | <b>Concentration, catalog number code and supplier</b>    |
|-------------------------------------------------------------------------|-----------------------------------------------------------|
| <b>Western blot antibodies</b>                                          |                                                           |
| phosphorylated (p) nuclear factor (p-NF)- $\kappa$ B                    | (1:1000, Cell Signaling, #3033, Danvers, Massachusetts)   |
| interleukin (IL)-1 $\beta$                                              | (1:1000, Cell Signaling, #12426, Danvers, Massachusetts)  |
| tumor necrosis factor (TNF)- $\alpha$                                   | (1:1000, Cell Signaling, , #3707, Danvers, Massachusetts) |
| matrix metalloproteinase (MMP)-9                                        | (1:1000, Abcam, ab76003, Cambridge, UK)                   |
| NOX-1                                                                   | (1:1000, Sigma, SAB4200097, Massachusetts, USA)           |
| NOX-2                                                                   | (1:1000, Sigma, SAB4200118, Massachusetts, USA)           |
| cleaved (c) caspase 3                                                   | (1:1000, Cell Signaling, #9665, Danvers, Massachusetts)   |
| c-Poly (ADP-ribose) Polymerase (C-PARP)                                 | (1:1000, Cell Signaling, #9542, Danvers, Massachusetts)   |
| $\gamma$ -H2AX                                                          | (1:1000, Cell Signaling, #7631, Danvers, Massachusetts)   |
| phosphorylated extracellular signal-regulated protein kinase (p-ERK1/2) | (1:3000, Millipore, 442685, Burlington, MA, U.S )         |
| phosphorylated c-Jun N-terminal kinase (p-JNK)                          | (1:1000, Abcam, ab4821, Cambridge, UK)                    |
| p-p38                                                                   | (1:1000, Sigma, M8177, Massachusetts, USA)                |
| Nav.1.3                                                                 | (1:500, Alomone, ASC004, Jerusalem, Israel)               |
| Nav.1.8                                                                 | (1:500, Abcam, ab63331, Cambridge, UK)                    |
| Nav.1.9                                                                 | (1:500, Alomone, ASC017, Jerusalem, Israel)               |
| horseradish peroxidase-conjugated anti-rabbit immunoglobulin IgG        | (1:5000, Sigma, A0545, Massachusetts, USA)                |
| <b>Immunofluorescent (IF) antibodies</b>                                |                                                           |
| phosphorylated (p)-p38                                                  | (1:200, GTX50280, Gene Tex, Irvine, CA)                   |
| NF200                                                                   | (1:200, NO142, Sigma-Aldrich, Massachusetts, USA)         |
| peripherin                                                              | (1:500, ab106276, Abcam, Cambridge, UK)                   |
| 53BP1                                                                   | (1:1000, NB100-304, Novus, Colorado, USA)                 |
| $\beta$ 3 Tubulin                                                       | (1:200, SC-51670, Santa Cruz, Texas, USA)                 |
